# Supplementary material
Source: ML conference proceedings conference paper supplement (https://proceedings.mlr.press/v108/huntsman20a.html)
Supplement: Supplementary file 1 [file huntsman20a-supp.pdf]

---

# Supplement to: Fast Markov chain Monte Carlo algorithms via Lie groups

---

**Steve Huntsman**  
BAE Systems FAST Labs

## 1 Proofs

*Proof of Lemma 1.*  $e_{(j,k)} e_{(\ell,m)} = (\delta_{k\ell} - \delta_{n\ell}) e_{(j,m)}$ . Considering  $j \leftrightarrow \ell, k \leftrightarrow m$ , we are done.  $\square$

*Proof of Lemma 2.* Using the rightmost expression in (5) and using  $j, k, \ell, m \neq n$  to simplify the product of the innermost two factors, we have that

$$e_{(j,k)}^{(p)} e_{(\ell,m)}^{(p)} = (\delta_{k\ell} + r_\ell) e_{(j,m)}^{(p)}.$$

Taking  $j = \ell$  and  $k = m$  establishes the result for  $i \leq 2$ . The general case follows by induction on  $i$ .  $\square$

*Proof of Theorem 1.* Note that

$$p e_{(j,k)}^{(p)} = (p_j - r_j p_n) (e_k^T - e_n^T) \equiv 0.$$

Furthermore, linear independence and the commutation relations are obvious, so it suffices to show that  $\exp t e_{(j,k)}^{(p)} \in \langle p \rangle$  for all  $t \in \mathbb{R}$ . By Lemma 2,

$$\begin{aligned} \exp t e_{(j,k)}^{(p)} &= I + e_{(j,k)}^{(p)} \sum_{i=1}^{\infty} \frac{t^i (\delta_{jk} + r_j)^{i-1}}{i!} \\ &= I + \frac{e^{t(\delta_{jk} + r_j)} - 1}{\delta_{jk} + r_j} e_{(j,k)}^{(p)}. \end{aligned}$$

$\square$

*Proof of Lemma 3.* By hypothesis and (5),  $-\sum_j t_j e_{(j,j)}^{(p)}$  has nonpositive diagonal entries and nonnegative off-diagonal entries (i.e., it is a generator matrix for a continuous-time Markov process); the result follows.  $\square$

*Proof of Lemma 4.*

$$\begin{aligned} \alpha_{(\mathcal{J})}^{(p)} \beta_{(\mathcal{J})}^{(p)} &= \sum_{u,v,w,x} \alpha_{j_u j_v} \beta_{j_w j_x} e_{(j_u, j_v)}^{(p)} e_{(j_w, j_x)}^{(p)} \\ &= \sum_{u,v,w,x} \alpha_{j_u j_v} (\delta_{j_v j_w} + r_{j_w}) \beta_{j_w j_x} e_{(j_u, j_x)}^{(p)} \\ &= \sum_{u,x} (\alpha_{(\mathcal{J})} (I + 1r_{(\mathcal{J})}) \beta_{(\mathcal{J})})_{ux} e_{(j_u, j_x)}^{(p)}. \end{aligned}$$

where the second equality follows from (1) and the third from bookkeeping.  $\square$

*Proof of Theorem 2.* The Sherman-Morrison formula (see Horn and Johnson (2013)) gives that

$$\omega(I + 1r_{(\mathcal{J})})^{-1} = \omega \left( I - \frac{1}{1 + r_{(\mathcal{J})} 1} 1r_{(\mathcal{J})} \right)$$

and the elements of this matrix are precisely the coefficients in (13). Using the notation of Lemma 4, we can therefore rewrite (13) as

$$A_{(\mathcal{J})}^{(p;\omega)} = (\omega(I + 1r_{(\mathcal{J})})^{-1})_{(\mathcal{J})}^{(p)},$$

whereupon invoking the lemma itself yields  $(A_{(\mathcal{J})}^{(p;\omega)})^{i+1} = \omega^i A_{(\mathcal{J})}^{(p;\omega)}$  for  $i \in \mathbb{N}$ . The result now follows similarly to Theorem 1.  $\square$

*Proof of Lemma 5.* Writing  $A \equiv A_{(\mathcal{J})}^{(p;\omega)}$  here for clarity, the result follows from three elementary observations:  $\Delta(A) \geq 0$ ,  $\max \Delta(A) > 0$ , and  $A - \Delta(\Delta(A)) \leq 0$ .  $\square$

## References

R. A. Horn and C. R. Johnson. *Matrix Analysis, 2nd. ed.* Cambridge, 2013.
